# Supplementary material for: Synthesis and electrochemical performance of nano-sized Li4Ti5O12 with double surface modification of Ti(III) and carbon
Source: Royal Society of Chemistry journal article supplement (doi:10.1039/b908025b), 2009-01-01
Supplement: b908025b.pdf [file b908025b.pdf]

*Supporting Information*

**Synthesis and electrochemical performance of Nano-sized  $\text{Li}_4\text{Ti}_5\text{O}_{12}$   
with double surface modification of Ti(III) and carbon**

*Yonggang Wang, Haimei Liu, Kaixue Wang, Hosono Eiji, Yarong Wang, and  
Haoshen Zhou\**

*Energy Technology Research Institute, National Institute of Advanced Industrial  
Science and Technology (AIST) Umezono, 1-1-1, Tsukuba, 305-8568 Japan*

---

\* Corresponding author: (E-mail) [hs.zhou@aist.go.jp](mailto:hs.zhou@aist.go.jp)

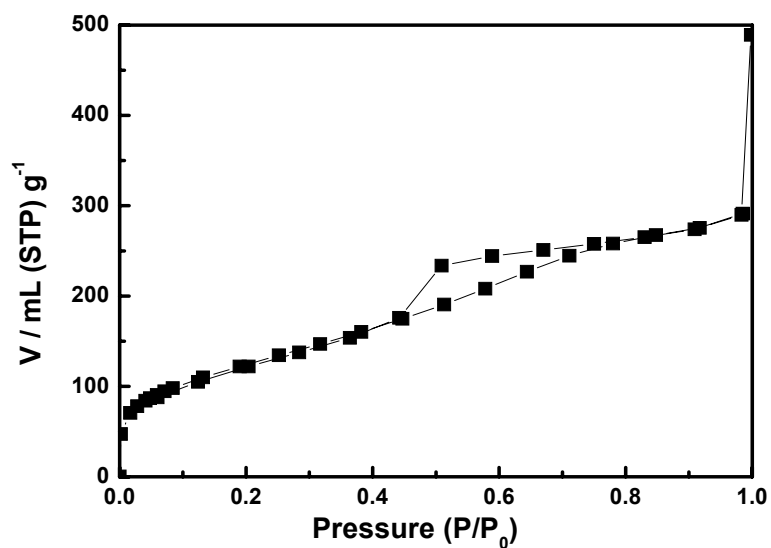

**Figure S1** The N<sub>2</sub> adsorption-desorption isotherm of prepared TiO<sub>2</sub>-PANI composite. As shown in Fig. S1, the prepared composite has a clear hysteresis loop within the relative pressure range of 0.4~0.8, indicating its typical mesoporous structure.

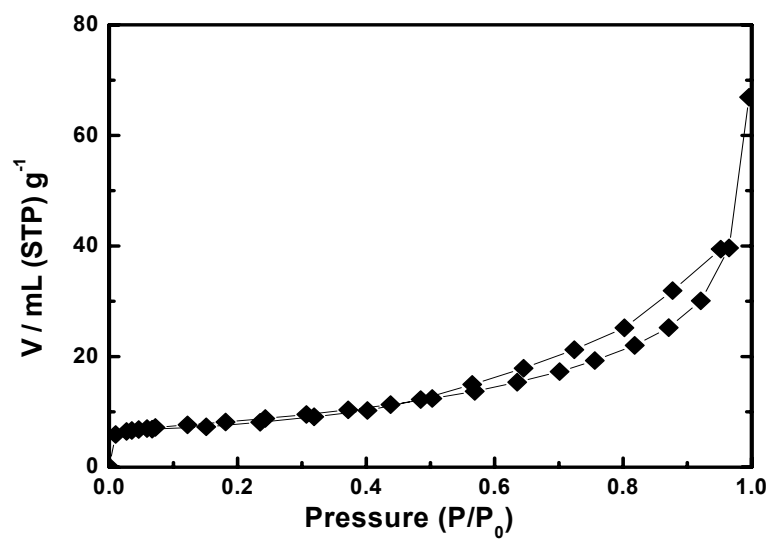

**Figure S2** The N<sub>2</sub> adsorption-desorption isotherm of prepared Li<sub>4</sub>Ti<sub>5</sub>O<sub>12</sub>-Carbon composite.

**Table S1** Information obtained from XPS spectra (BE is binding energy).

|       |    | Li <sub>4</sub> Ti <sub>5</sub> O <sub>12</sub> |                      | TiO <sub>2</sub> |                      | Assignment                                                                        |
|-------|----|-------------------------------------------------|----------------------|------------------|----------------------|-----------------------------------------------------------------------------------|
|       |    | BE<br>(eV)                                      | Atom Ratio<br>(100%) | BE<br>(eV)       | Atom Ratio<br>(100%) |                                                                                   |
| C 1s  | 01 | 284.6                                           | 13                   | 284.6            | 7                    | C-C, C-H                                                                          |
|       | 02 | 285.8                                           | 6                    | 285.6            | 4                    | C-O                                                                               |
|       | 03 | 287.3                                           | 3                    | 287.2            | 3                    | C=O                                                                               |
|       | 04 | 288.9                                           | 4                    | 288.9            | 3                    | O-C=O                                                                             |
|       | 05 | 290.6                                           | 6                    | -                | -                    | CO <sub>3</sub> <sup>2-</sup>                                                     |
| O 1s  | 01 | 530.4                                           | 25                   | 530.2            | 53                   | Metal-O                                                                           |
|       | 02 | 532.3                                           | 11                   | 531.6            | 6                    | O-C, O=C                                                                          |
| Li 1s | 01 | 55.4                                            | 22                   | -                | -                    | <u>Li</u> <sub>4</sub> Ti <sub>5</sub> O <sub>12</sub>                            |
| Ti 2p | 01 | 459.1                                           | 10 <sup>(a)</sup>    | 459.1            | 24 <sup>(b)</sup>    | Li <sub>4</sub> <u>Ti</u> <sub>5</sub> O <sub>12</sub> , <u>Ti</u> O <sub>2</sub> |
|       | 02 | 464.8                                           |                      | 464.8            |                      |                                                                                   |

a. the total Ti atom ration in Li<sub>4</sub>Ti<sub>5</sub>O<sub>12</sub> is 10%. b. the total Ti atom ration in TiO<sub>2</sub> is 24%.
